# Supplementary material for: STA-27, a porous Lewis acidic scandium MOF with an unexpected topology type prepared with 2,3,5,6-tetrakis(4-carboxyphenyl)pyrazine
Source: Royal Society of Chemistry journal article supplement (doi:10.1039/c8ta10610j), 2019-01-01
Supplement: c8ta10610j1.pdf [file c8ta10610j1.pdf]

## **STA-27, a porous Lewis acidic scandium MOF with an unexpected topology type prepared with 2,3,5,6-tetrakis(4-carboxyphenyl)pyrazine**

Ram R. R. Prasad,<sup>a</sup> Sarah E. Seidner,<sup>a</sup> David B. Cordes,<sup>a</sup> Magdalena M. Lozinska,<sup>a</sup> Daniel M. Dawson,<sup>a</sup> Megan J. Thompson,<sup>b</sup> Tina Düren,<sup>b</sup> Kristina K. Chakarova,<sup>c</sup> Mihail Y. Mihaylov,<sup>c</sup> Konstantin I. Hadjiivanov,<sup>c</sup> Frank Hoffmann,<sup>d</sup> Alexandra M. Z. Slawin,<sup>a</sup> Sharon. E. Ashbrook,<sup>a</sup> Matthew L. Clarke<sup>a</sup> and Paul A. Wright<sup>a\*</sup>

<sup>a</sup> *EaStCHEM School of Chemistry, University of St Andrews, Purdie Building, North Haugh, St Andrews, KY16 9ST, UK.*

<sup>b</sup> *Centre for Advanced Separations Engineering, Department of Chemical Engineering, University of Bath, Bath, BA2 7AY, UK.*

<sup>c</sup> *Institute of General and Inorganic Chemistry, Bulgarian Academy of Sciences, Sofia 1113, Bulgaria.*

<sup>d</sup> *Institute of Inorganic and Applied Chemistry, Department of Chemistry, University of Hamburg, Martin-Luther-King-Platz 6, 20146 Hamburg, Germany.*

**E-mail : paw2@st-andrews.ac.uk**

## Contents

|                                                                         |           |
|-------------------------------------------------------------------------|-----------|
| <b>1. Synthesis of 2,3,5,6-tetrakis(4-carboxyphenyl)pyrazine (TCPP)</b> | <b>2</b>  |
| <b>2. Characterisation</b>                                              | <b>7</b>  |
| <b>3. NMR Spectra of the Products</b>                                   | <b>12</b> |

## 1. Synthesis of 2,3,5,6-tetrakis(4-carboxyphenyl)pyrazine (TCPP)

### Synthesis of dimethyl-4,4'-(2-hydroxyacetyl)dibenzoate, 1a

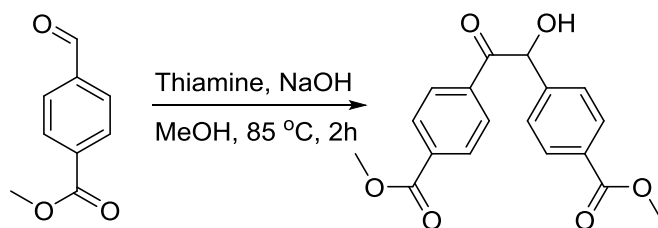

Compound 1a was synthesised by modifying the literature procedure.<sup>S1</sup> 3 g Thiamine hydrochloride (0.89 mmol) was dissolved in a solvent mixture of 25 mL water and methanol (1:3 ratio) and cooled using an ice-bath. To the solution kept at 0 °C, 8.3 mL of 2M NaOH solution was added dropwise for a period of 10 min (solution turns pale yellow). 24.8 g of 4-formylbenzoate (151 mmol) was added to the above solution and the mixture was heated to room temperature and kept at 60 °C for 15 min, before refluxing at 80 °C for 2 h. The resulting suspension was cooled to room temperature and the precipitated yellowish solid was washed multiple times with water, methanol and diethyl ether to obtain pale yellow solid . Yield :22. 7 g, (45%).

<sup>1</sup>H NMR (400MHz, CDCl<sub>3</sub>) δ(ppm): 8.11 (d, *J*=8.5Hz, 2H), 8.02 (d, *J*=8.5 Hz, 2H), 7.92(d, *J*=8.4Hz), 7.57(d, *J*=8.3Hz, 2H), 6.50(d, *J*=6.1Hz), 6.18(d, *J*=6.1Hz), 3.86(s, 3H), 3.82(s, 3H).

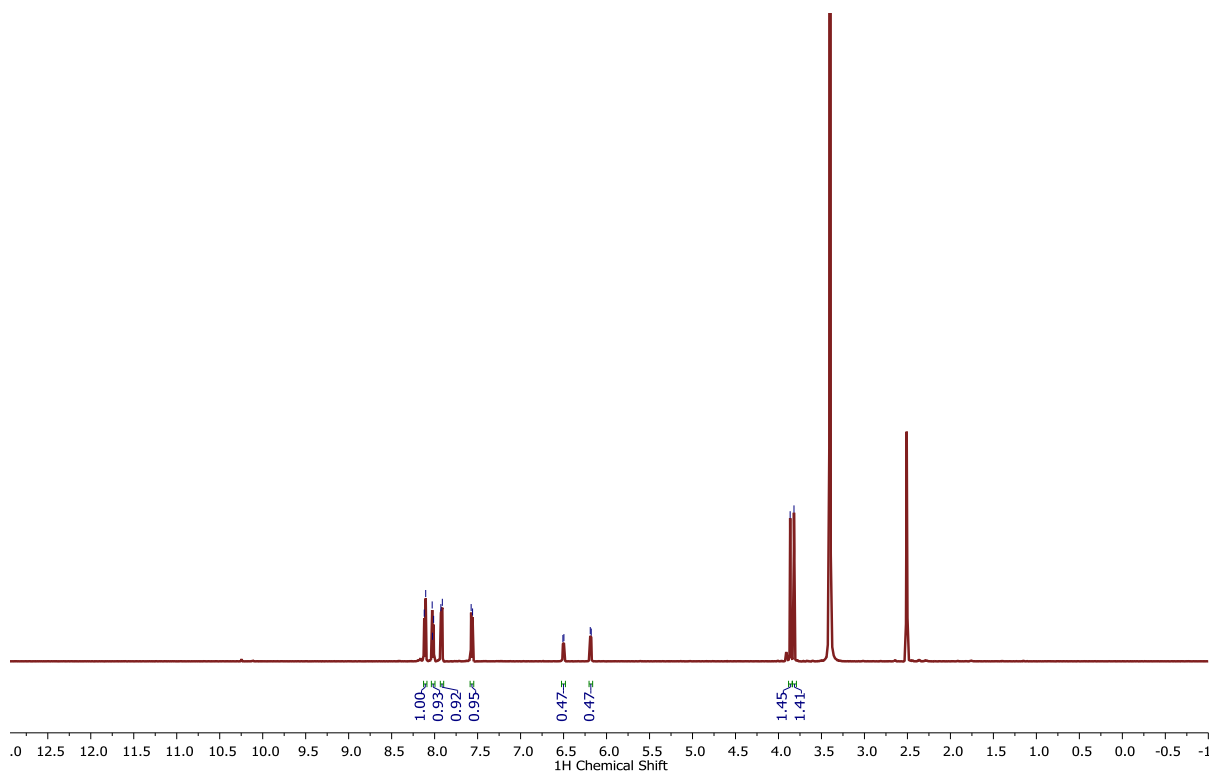

### Synthesis of 2,3,5,6-tetrakis(4-methoxycarbonyl)phenylpyrazine, **1b**

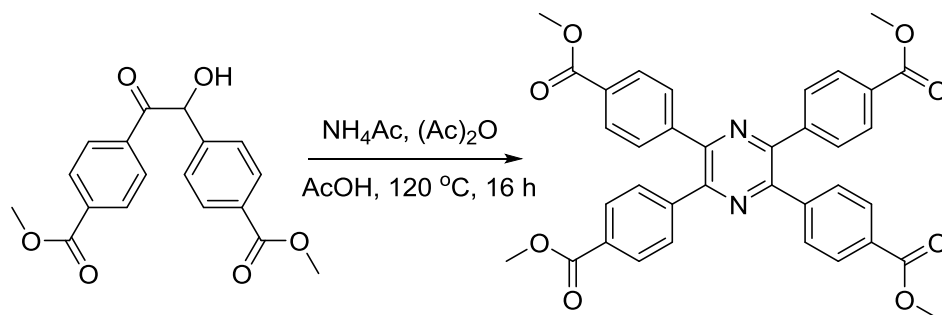

**1b** was synthesised by following the literature procedure.<sup>52</sup> 15 g dimethyl-4,4'-(2-hydroxyacetyl)dibenzoate (45.7 mmol) (**1a**) and 10.6 g ammonium acetate (137 mmol) was dissolved in a solvent mixture of 46 mL acetic acid and 6.48 mL of acetic anhydride and stirred at 120 °C for 12 h. The precipitate obtained was washed multiple times with water and diethyl ether to isolate the product as yellow solid. Yield : 4.73 g (17%).

<sup>1</sup>H NMR (400MHz, CDCl<sub>3</sub>) δ(ppm): 8.01(d, *J*=8.6Hz, 8H), 7.69(d, *J*=8.6 Hz, 8H), 3.93(s, 12H).

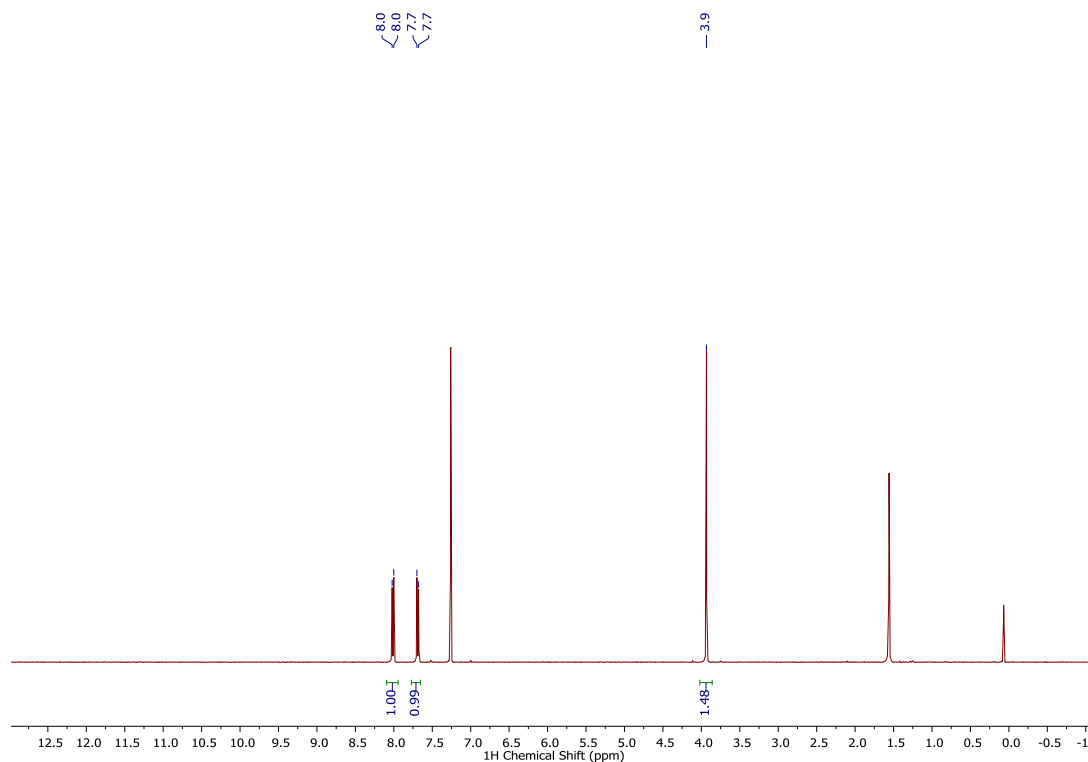

### Synthesis of 2,3,5,6-tetrakis(4-carboxyphenyl)pyrazine (H<sub>4</sub>TCPP)

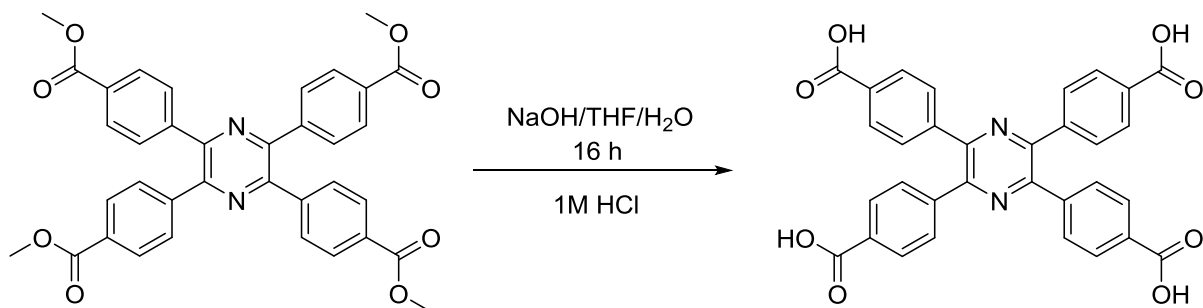

The product was synthesised following the literature procedure reported.<sup>S2</sup> 4.73 g tetramethyl-4,4',4'',4'''-(pyrazine-2,3,5,6-tetrayl)tetrabenzoate (7.67 mmol) was added to a solvent mixture of 140 mL THF and H<sub>2</sub>O in 1:1 ratio with 3.68 g NaOH. The mixture was refluxed for 12 h at 90 °C and the solvent was reduced under vacuum. The solution was then acidified with 1M HCl to reach pH 4-5. The off-white precipitate thus obtained was washed multiple times with water and dried at 100 °C overnight. Yield : 3.82 g (89%). Data in accordance with the literature.

<sup>1</sup>H NMR (400MHz, DMSO-*d*<sub>6</sub>) δ(ppm): 7.93(d, *J*=8.5Hz, 8H), 7.68(d, *J*=8.5 Hz, 8H).

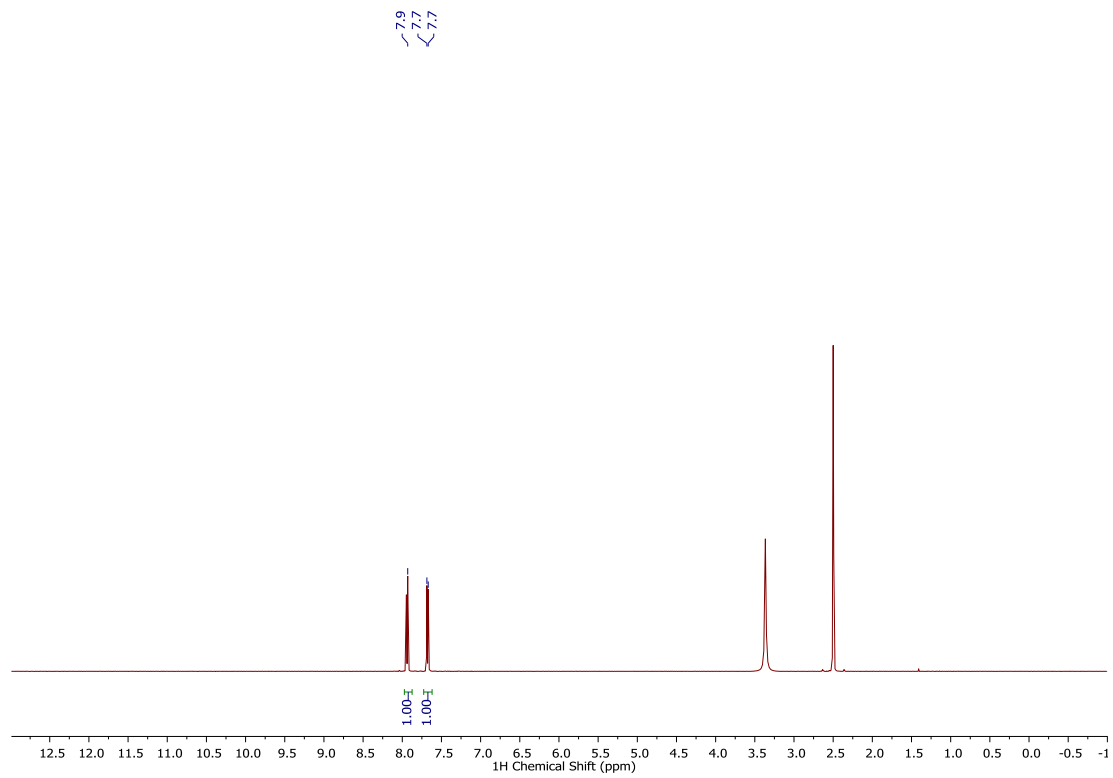

## 2. Characterisation

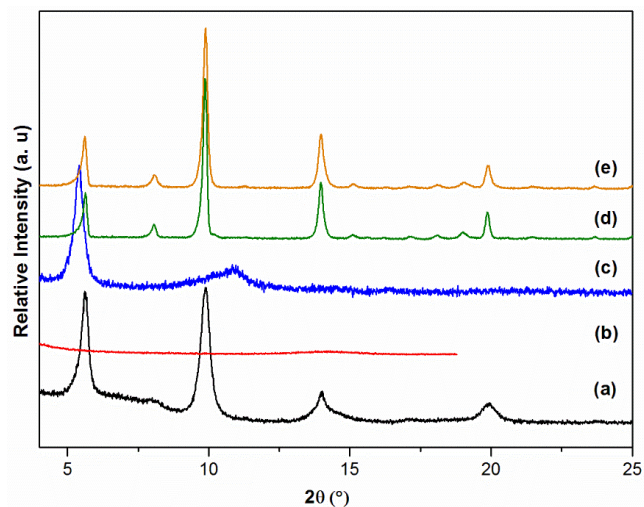

**Figure S1:** PXRD patterns of  $\text{Al}_2(\text{OH})_2\text{TCPP}$  synthesis attempts: a) In equivolume DMF - 3.5 M aq.  $\text{HNO}_3$  - AcCN at 150 °C for 30 h using  $\text{Al}(\text{NO}_3)_3 \cdot 9\text{H}_2\text{O}$  and  $\text{H}_4\text{TCPP}$  as precursors b) In DMF at 150 °C for 30 h using  $\text{Al}(\text{NO}_3)_3 \cdot 9\text{H}_2\text{O}$  and  $\text{H}_4\text{TCPP}$  as precursors, c) in equivolume DMF and AcCN at 150 °C for 30 h using  $\text{Al}(\text{NO}_3)_3 \cdot 9\text{H}_2\text{O}$  and  $\text{H}_4\text{TCPP}$  as precursors, d) In equivolume DMF and 3.5 M aq.  $\text{HNO}_3$  at 150 °C for 30 h using  $\text{Al}(\text{NO}_3)_3 \cdot 9\text{H}_2\text{O}$  and  $\text{H}_4\text{TCPP}$  as precursors and e) In equivolume DMF and 3.5 M Aq.  $\text{HNO}_3$  at 150 °C for 30 h using  $\text{AlCl}_3 \cdot 6\text{H}_2\text{O}$  and  $\text{H}_4\text{TCPP}$  as precursors.

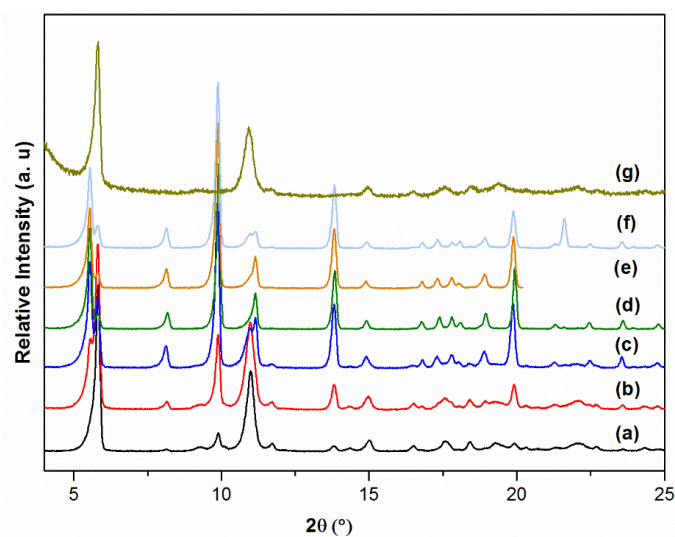

**Figure S2:** PXRD patterns of  $\text{Ga}_2(\text{OH})_2\text{TCPP}$  synthesis attempts in equivolume DMF and 3.5 M aq.  $\text{HNO}_3$  using  $\text{Ga}(\text{NO}_3)_3 \cdot 6\text{H}_2\text{O}$  and  $\text{H}_4\text{TCPP}$  as precursors: a) at 150 °C for 30 h, b) at 150 °C for 16 h, c) at 150 °C for 35 h, d) at 150 °C for 40 h, e) at 150 °C for 48 h, f) at 150 °C for 72 h and e) at 150 °C for 96 h.

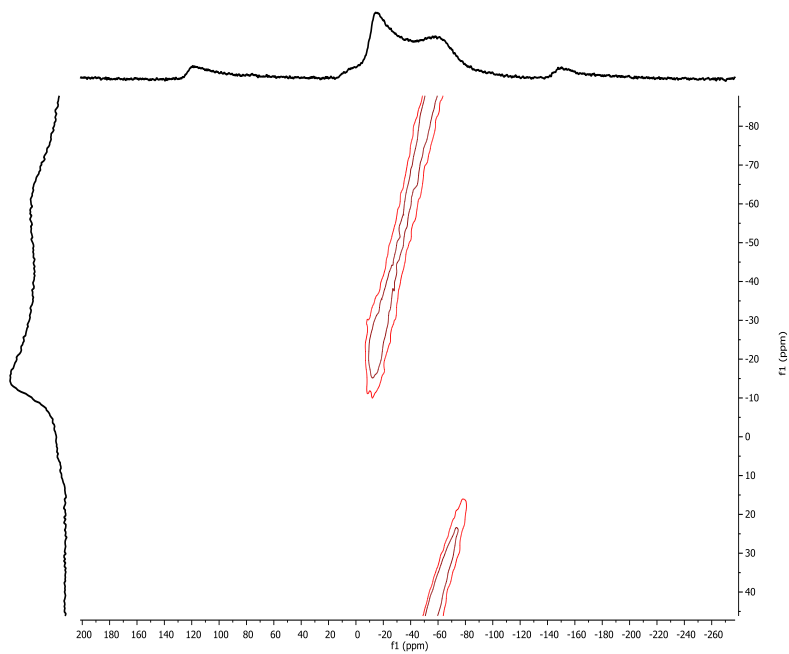

**Figure S3:**  $^{27}\text{Al}$  MQ MAS NMR of  $\text{Al}_2(\text{OH})_2\text{TCPP}$ .

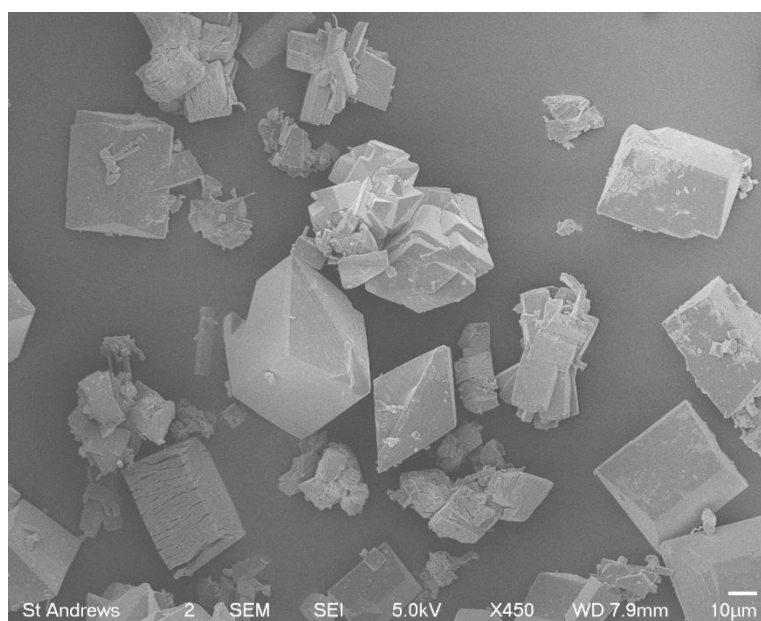

**Figure S4:** SEM images of  $\text{Ga}_2(\text{OH})_2\text{TCPP}$ .



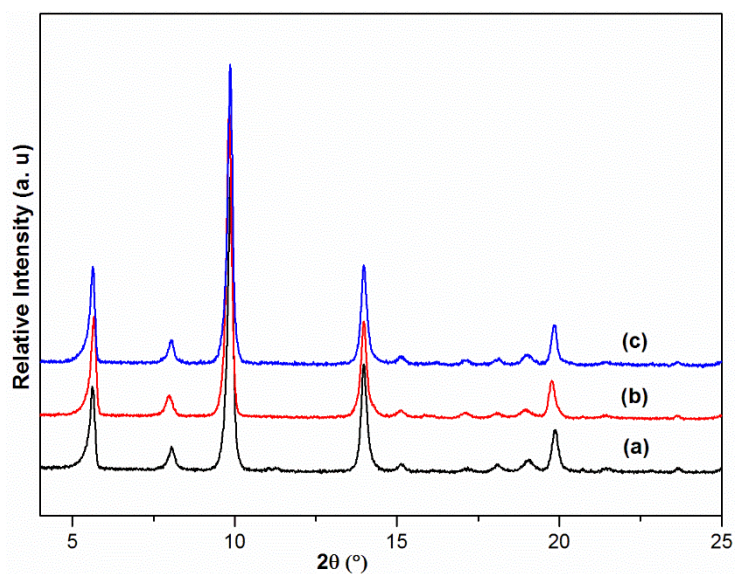

**Figure S5:** PXRD patterns of (a) as-synthesised  $\text{Al}_2(\text{OH})_2\text{TCPP}$  compared with (b)  $\text{Al}_2(\text{OH})_2\text{TCPP}$  after  $\text{N}_2$  adsorption studies and (c)  $\text{Al}_2(\text{OH})_2\text{TCPP}$  after VT- $\text{CO}_2$  adsorption studies.

| <b>Table ST1:</b> Optimising synthesis conditions for STA-27, $\text{Sc}_2(\text{O})(\text{H}_2\text{O})_2\text{TCPP}$ . In each case 0.895 mmol $\text{ScCl}_3 \cdot 6\text{H}_2\text{O}$ and 0.074 mmol $\text{H}_4\text{TCPP}$ are used as reagents (M:L = 12:1) |          |                             |                             |                                  |          |                           |
|---------------------------------------------------------------------------------------------------------------------------------------------------------------------------------------------------------------------------------------------------------------------|----------|-----------------------------|-----------------------------|----------------------------------|----------|---------------------------|
| Metal Source                                                                                                                                                                                                                                                        | DMF (mL) | $\text{HNO}_3$ (3.5 M) (mL) | $\text{CH}_3\text{CN}$ (mL) | Temperature ( $^\circ\text{C}$ ) | Time (h) | Phase Purity              |
| $\text{ScCl}_3 \cdot 6\text{H}_2\text{O}$                                                                                                                                                                                                                           | 7.5      | 7.5                         | -                           | 150                              | 30       | Unknown Impurity          |
| $\text{ScCl}_3 \cdot 6\text{H}_2\text{O}$                                                                                                                                                                                                                           | 7.5      | 7.5                         | 7.5                         | 150                              | 16       | Microcrystalline STA-27   |
| $\text{ScCl}_3 \cdot 6\text{H}_2\text{O}$                                                                                                                                                                                                                           | 7.5      | 7.5                         | 7.5                         | 150                              | 30       | Single crystals of STA-27 |

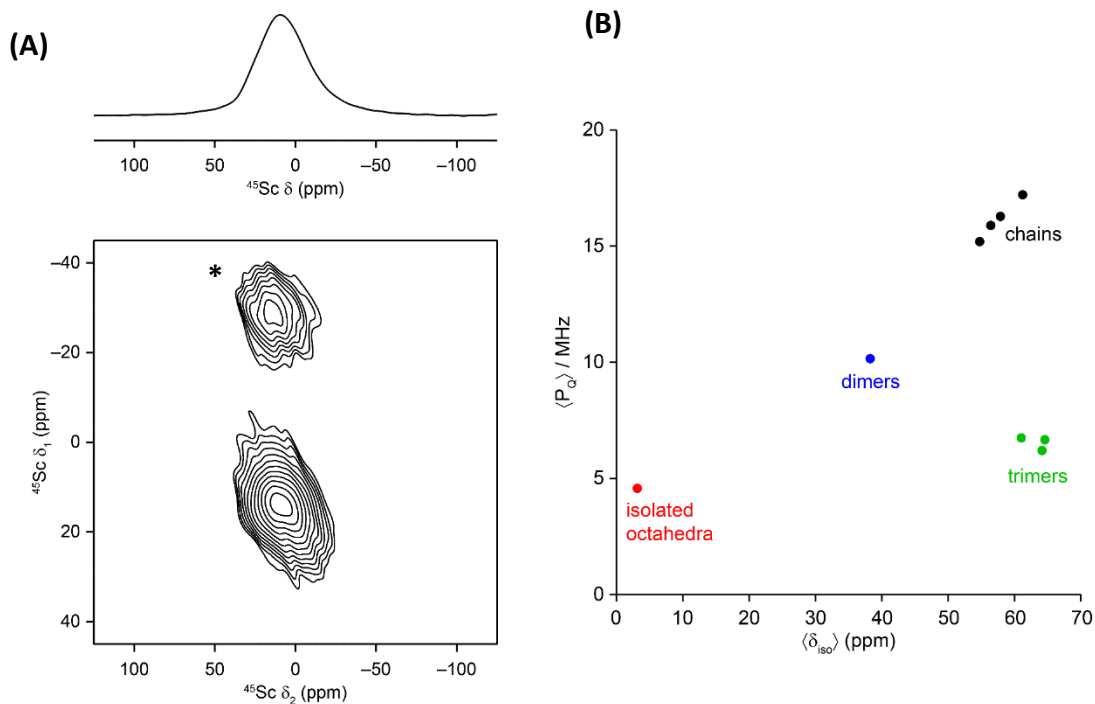

(C)

| MOF                              | SBU       | $\delta_{iso}$ (ppm) | $P_Q$ / MHz | Ref DOI                         |                                 |  |  |
|----------------------------------|-----------|----------------------|-------------|---------------------------------|---------------------------------|--|--|
| STA-27                           |           | 38.3                 | 10.13       |                                 |                                 |  |  |
| Sc <sub>2</sub> BDC <sub>3</sub> | octahedra | 3.1                  | 4.55        | 10.1016/j.micromeso.2010.12.016 |                                 |  |  |
| MIL-53(Sc) dried                 | chains    | 54.7                 | 15.2        | 10.1039/c1dt11729g              | 10.1016/j.micromeso.2010.12.016 |  |  |
|                                  | chains    | 56.5                 | 15.9        |                                 |                                 |  |  |
| MIL-53(Sc) H <sub>2</sub> O      | chains    | 57.9                 | 16.3        |                                 |                                 |  |  |
|                                  | chains    | 61.3                 | 17.2        |                                 |                                 |  |  |
| MIL-88(Sc)                       | trimers   | 64.6                 | 6.65        | 10.1016/j.micromeso.2010.12.016 |                                 |  |  |
| MIL-100(Sc)                      | trimers   | 61.15                | 6.75        | 10.1002/chem.201404377          | 10.1016/j.micromeso.2010.12.016 |  |  |
| Sc-ABTC                          | trimers   | 64.1                 | 6.2         | 10.1016/j.micromeso.2010.12.016 |                                 |  |  |

**Figure S6:** <sup>45</sup>Sc MAS NMR and MQ MAS NMR spectra of STA-27. (B) Plot of mean <sup>47</sup>Sc isotropic shift  $\langle \delta_{iso} \rangle$  and quadrupolar product  $\langle P_Q \rangle$  for a series of Sc-containing MOFs with different Sc coordination motifs.<sup>53</sup> Red circle = isolated ScO<sub>6</sub> octahedra (Sc<sub>2</sub>BDC<sub>3</sub> and derivatives), black circles = chains of ScO<sub>6</sub> octahedra (MIL-53 and derivatives) and green circles = trimers of ScO<sub>6</sub> octahedra (MIL-88, MIL-100 and Sc-ABTC, ABTC = 3,3',5,5'-azobenzene-tetracarboxylate). Dimer based chains of STA-27 is shown by blue circle. Reference points were obtained from multiple-quantum (MQ) MAS experiments carried out at 20.0 T, whereas spectra for STA-27 were recorded at 9.4 T as described in the experimental details. Asterisk denotes spinning side band.

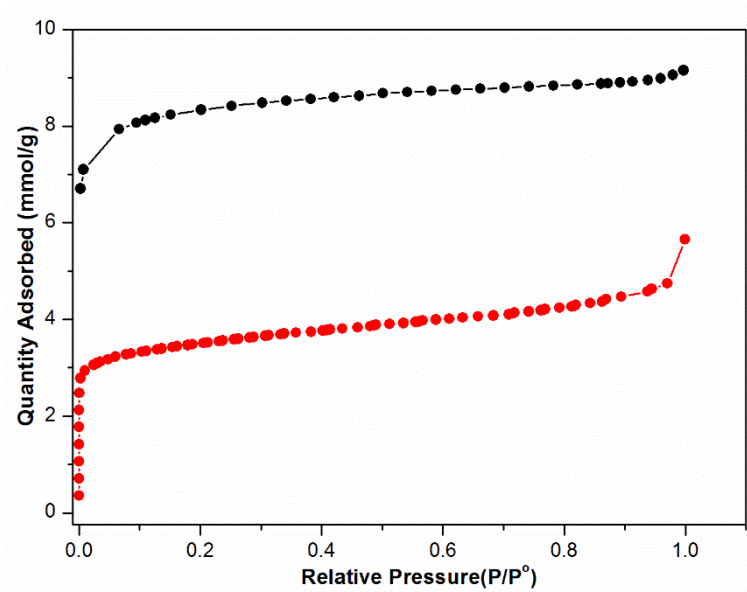

**Figure S7:** N<sub>2</sub> adsorption isotherm at -196 °C for STA-27 (black) and STA-27-C (red).

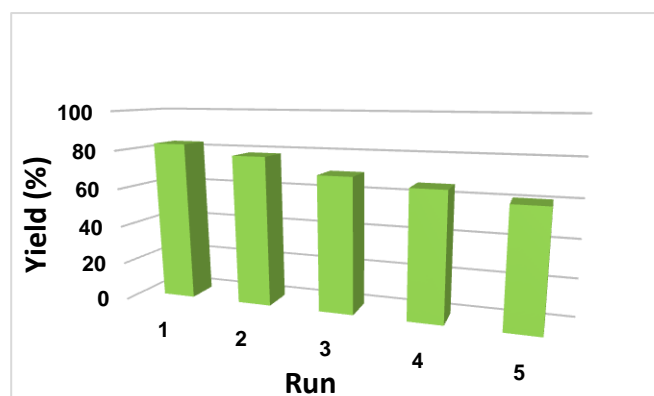

**Figure S8:** Plots of yields (%) of imine at different runs in the recycle experiments of STA-27 for imine condensation reaction between 4'-fluoroacetophenone and benzylamine.

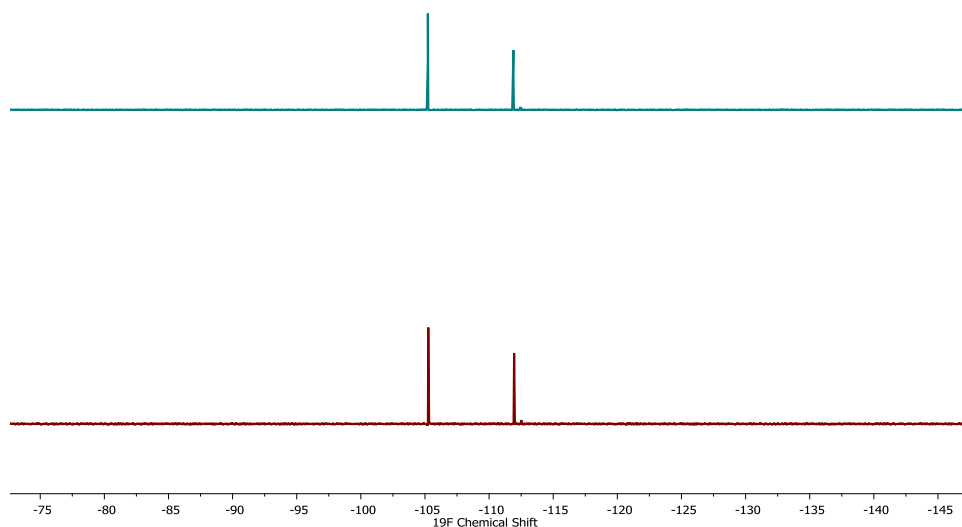

**Figure S9:**  $^{19}\text{F}\{^1\text{H}\}$  NMR spectra of imine condensation between 4'-fluoroacetophenone and benzylamine catalysed by STA-27 at 90 °C in toluene under inert atmosphere stopped after 5h (below) and  $^{19}\text{F}\{^1\text{H}\}$  NMR spectra of the filtrate after subsequent heating at 90 °C for 12 h in toluene under inert atmosphere after the removal of catalyst by hot filtration (above). No further conversion was observed once the catalyst is removed.

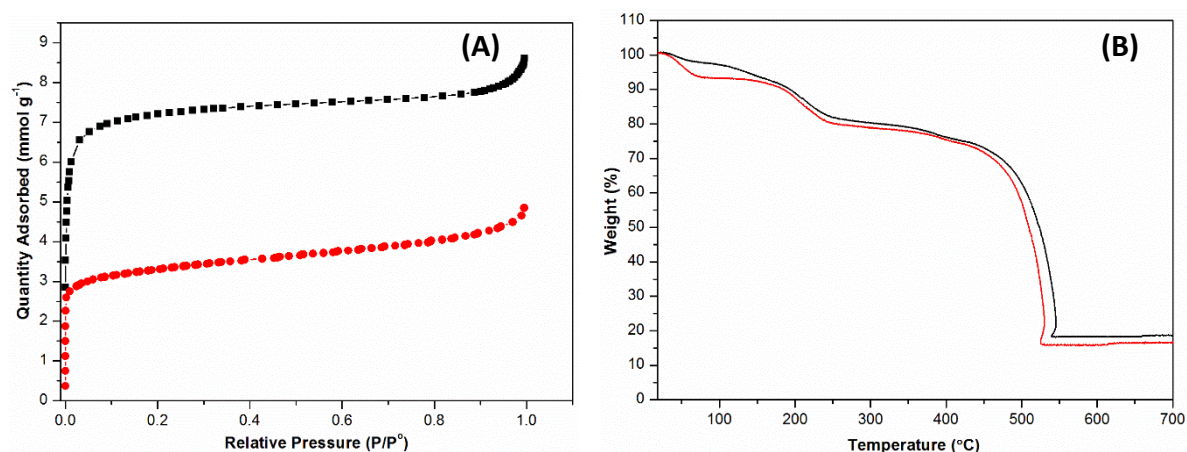

**Figure S10:** (A)  $\text{N}_2$  adsorption of the STA-27 recovered after carbonyl ene reaction *via* the removal of reaction solution without acetone wash (black) and  $\text{N}_2$  adsorption of the STA-27 recovered after catalysis after overnight soaking and multiple washes with acetone (red) and (B) TGA of STA-27 recovered after carbonyl ene reaction *via* the removal of reaction solution without acetone wash (black) and TGA of STA-27 recovered after catalysis after overnight soaking and multiple washes with acetone (red).

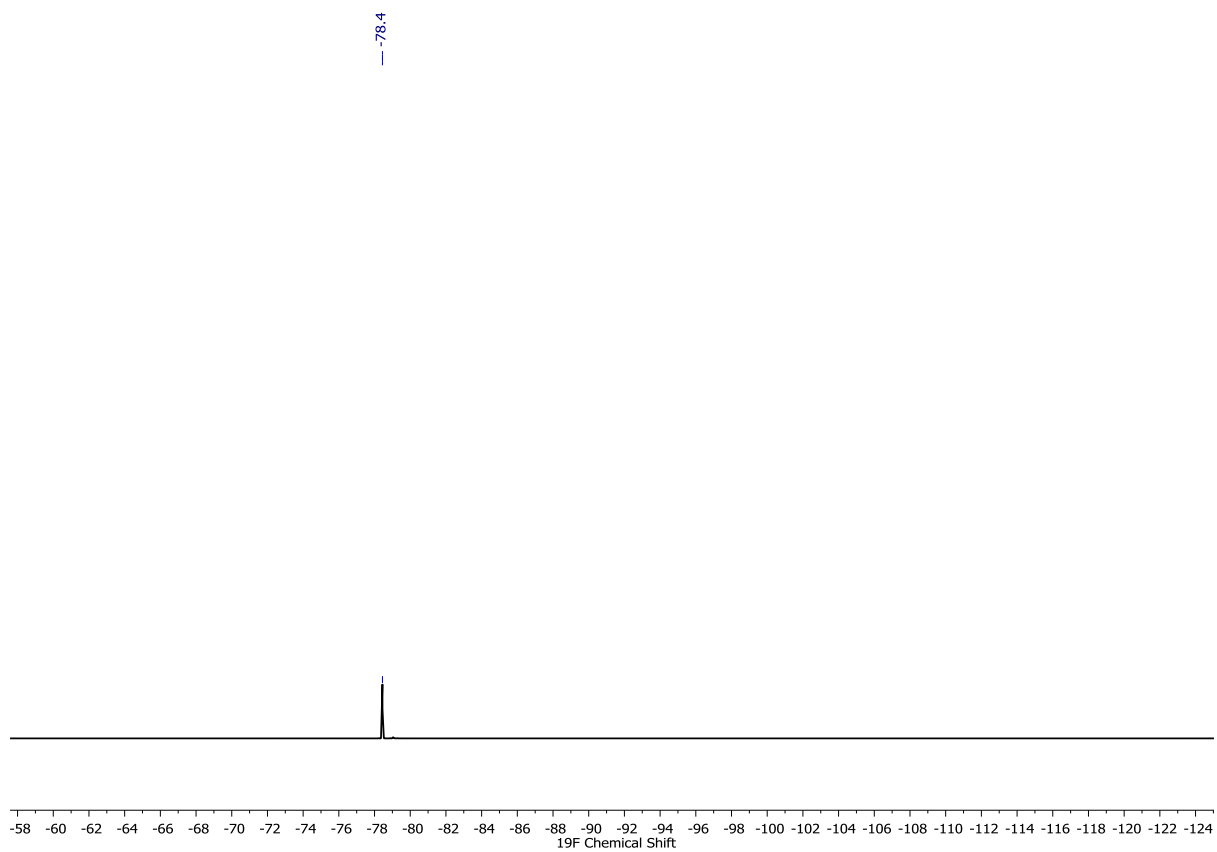

**Figure S11:**  $^{19}\text{F}\{^1\text{H}\}$  NMR spectra of dissolved STA-27 recovered from carbonyl ene reaction after  $\text{N}_2$  adsorption studies.

### 3. NMR Spectra of the products

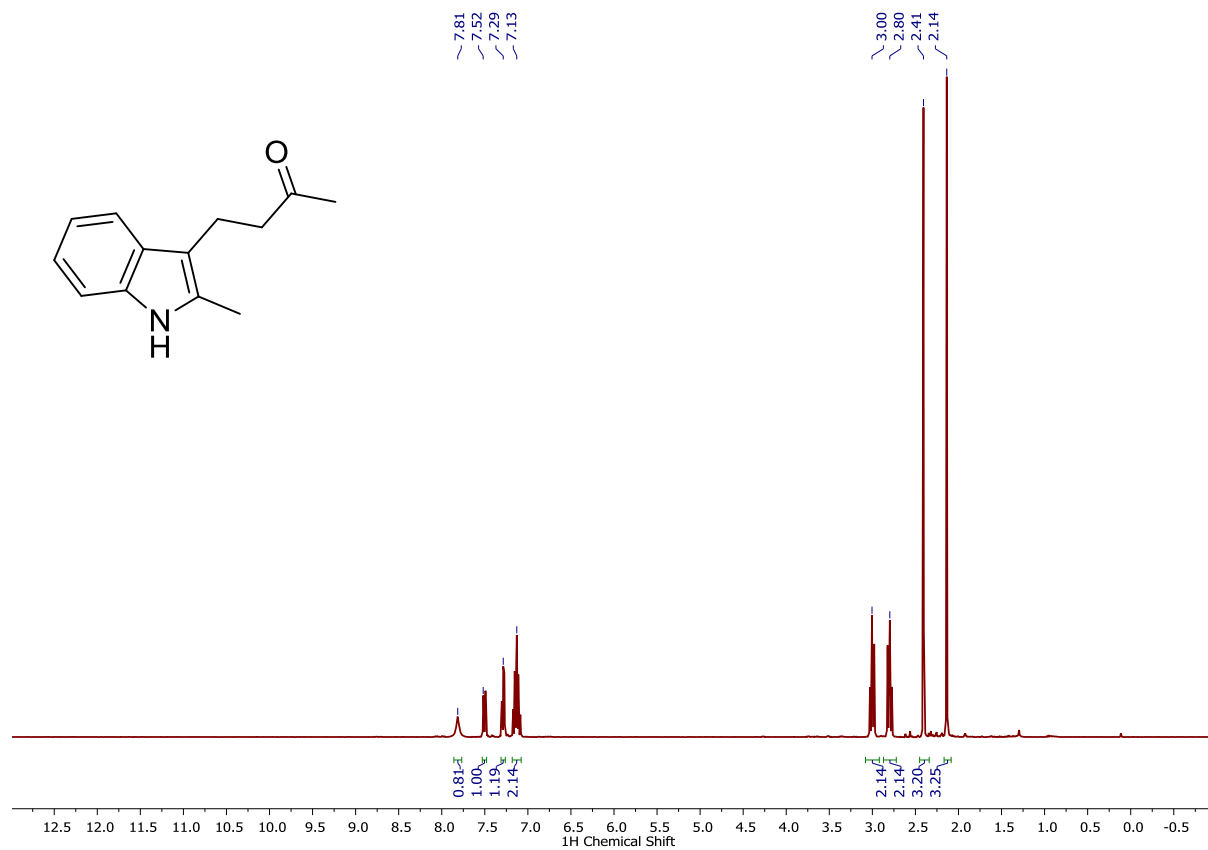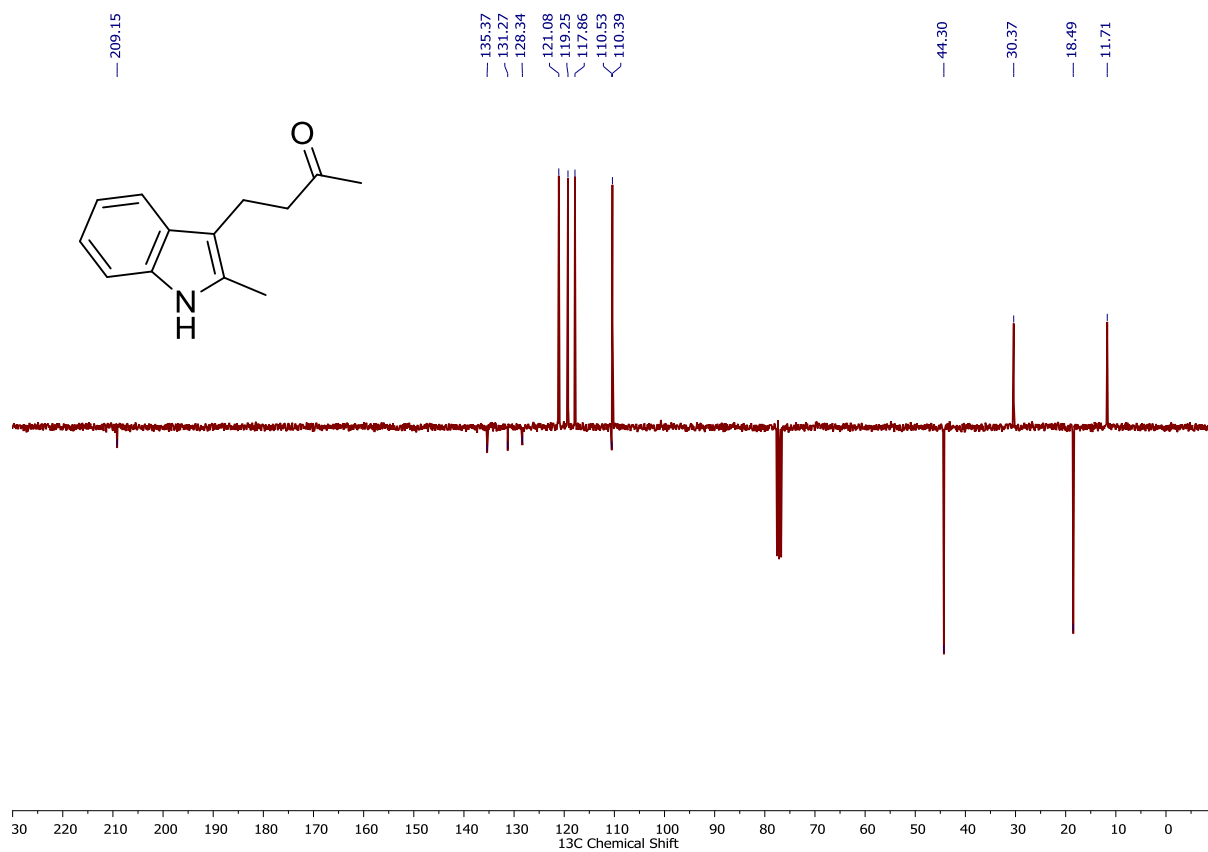

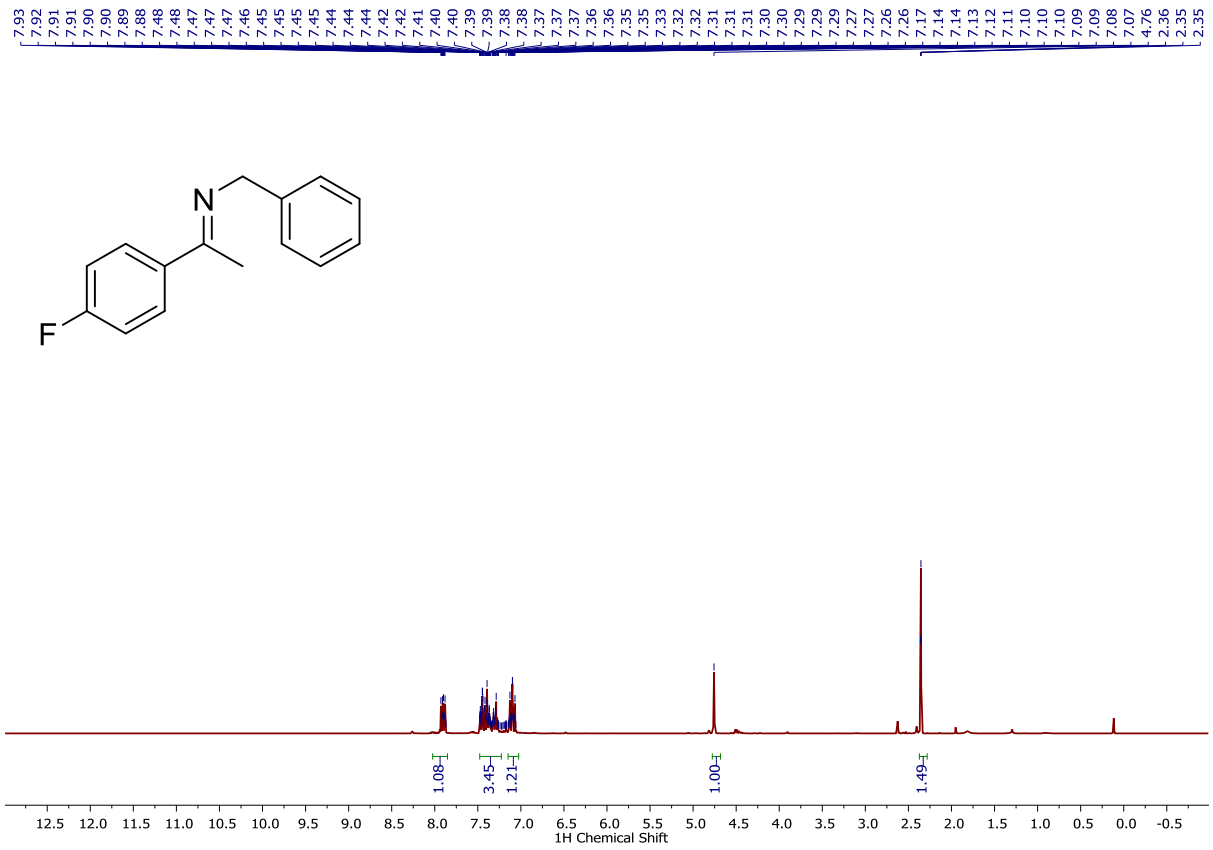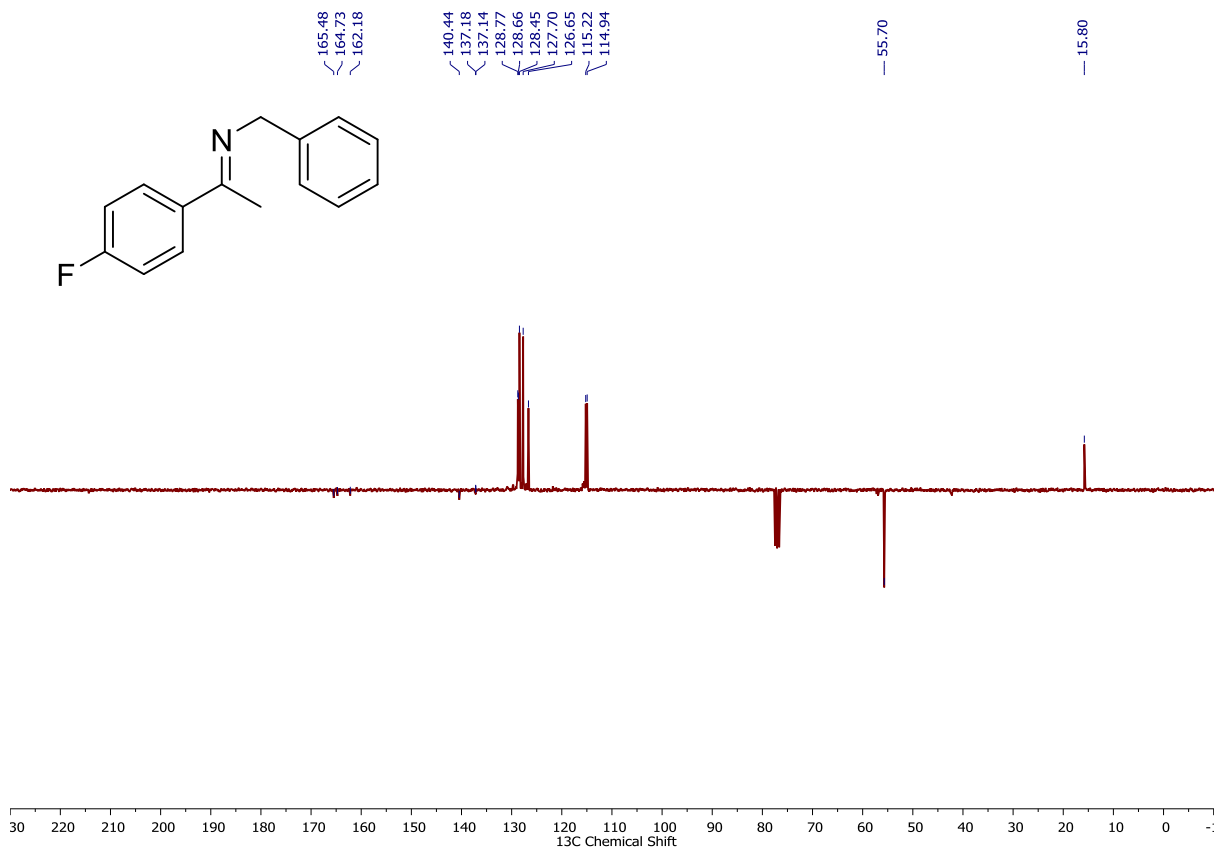

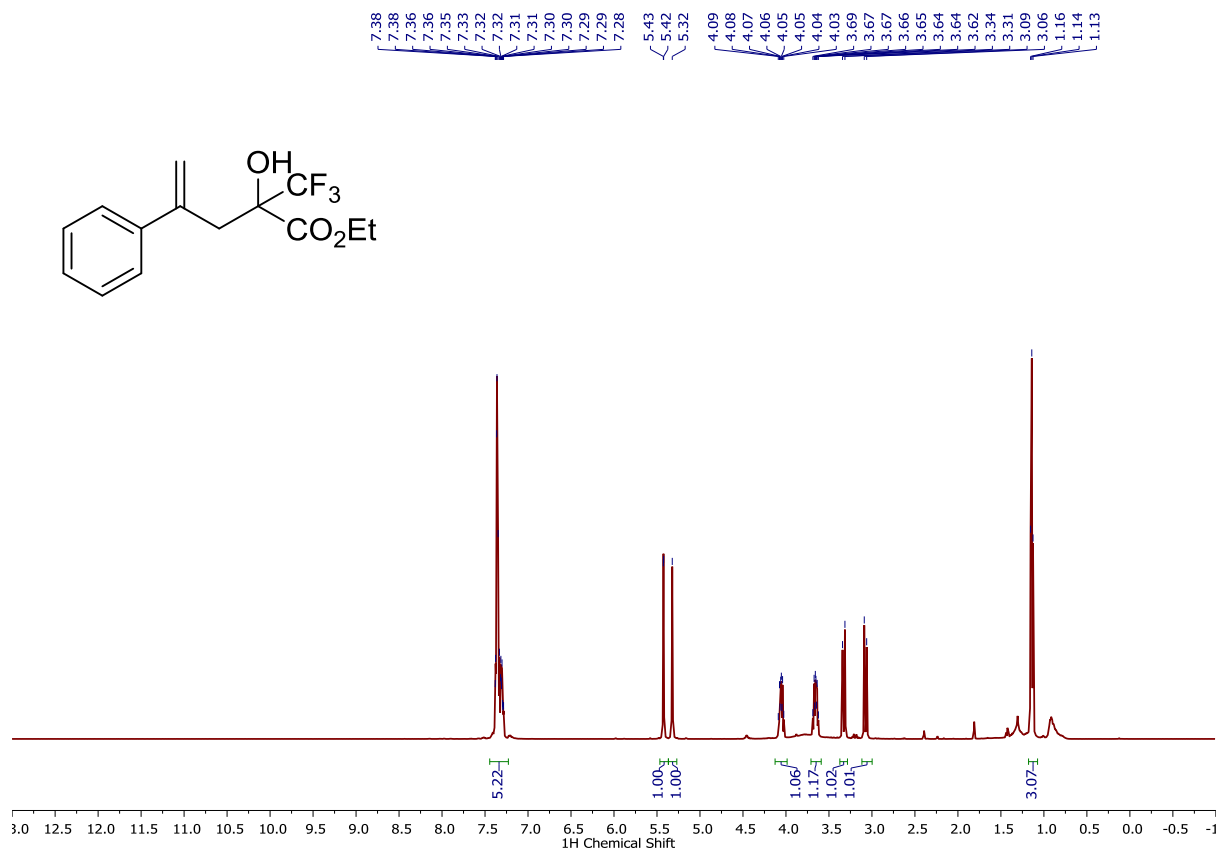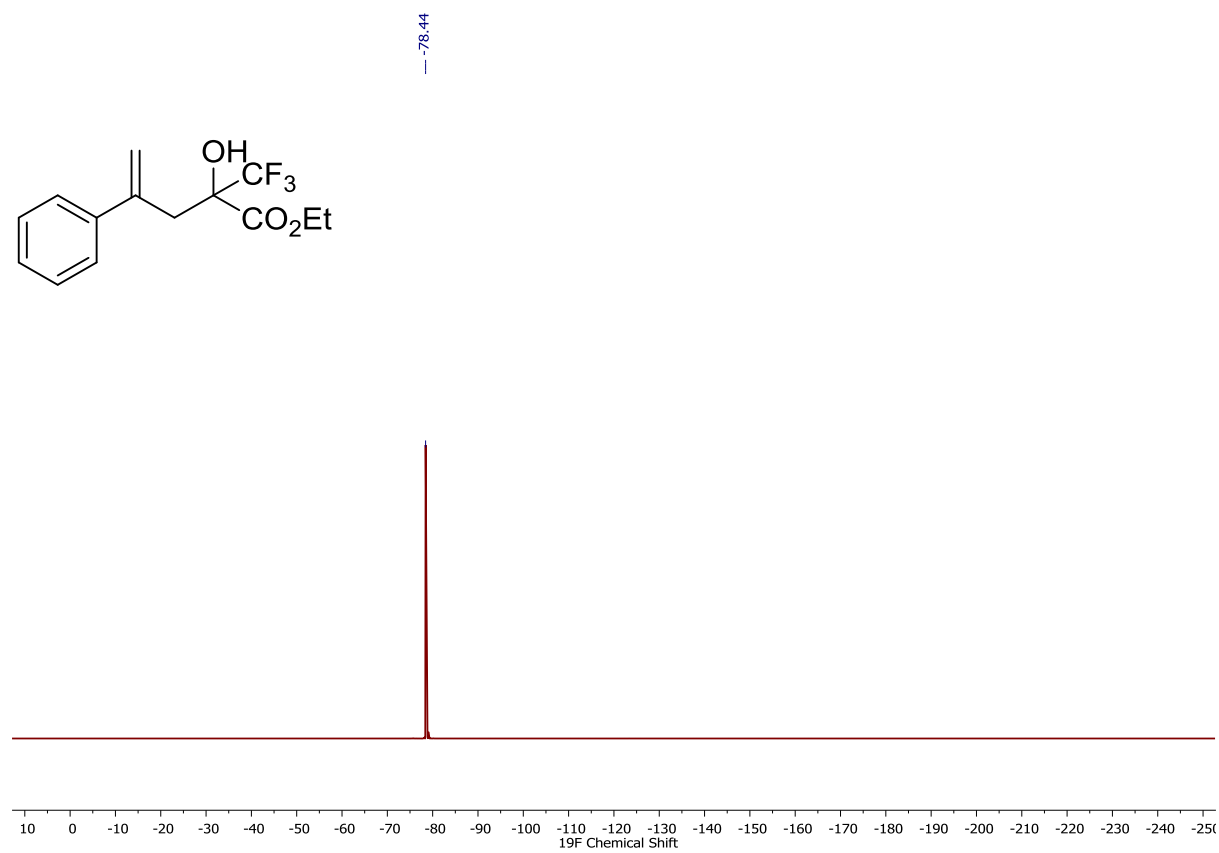



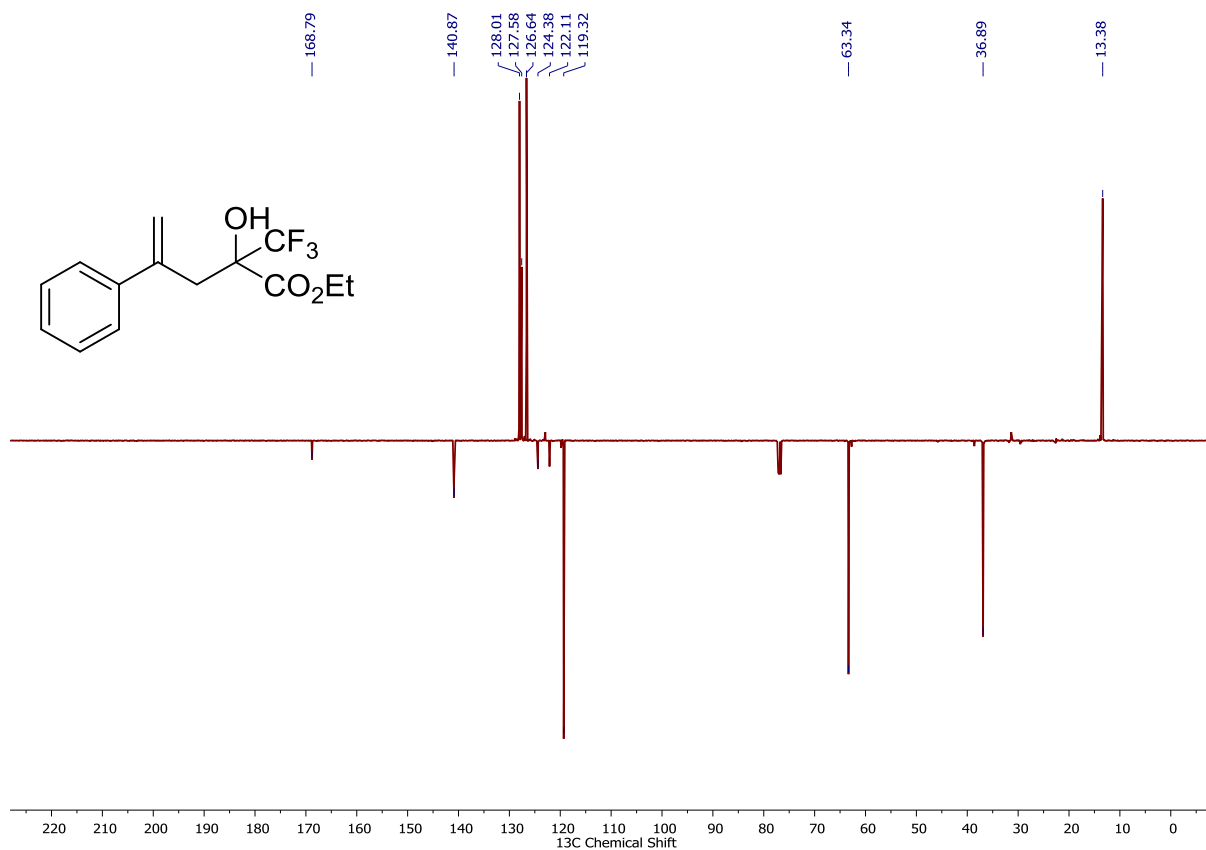

## 5. References

- S1. S. Pizarro, M. Gallardo, C. Leyton, E. Castro, F. Gajardo and A. Delgadillo, *Spectrochimica Acta part A: Molecular and Biomolecular Spectroscopy.*, 2015, **146**, 61-65.
- S2. Y. Jiang, L. Sun, J. Du, Y. Liu, H. Shi, Z. Liang and J. Li, *Cryst. Growth, Des.*, 2017, **17**, 2090-2096.
- S3. V. R. Seymour, *PhD Thesis*, University of St Andrews, 2013.
